# Supplementary material for: The importance of copper-phyllosilicate formed in CuO/SiO2 catalysts in the ethynylation of formaldehyde for 1,4-butynediol synthesis
Source: Royal Society of Chemistry journal article supplement (doi:10.1039/d2re00514j), 2022-12-26
Supplement: d2re00514j1.pdf [file d2re00514j1.pdf]

Supplementary information

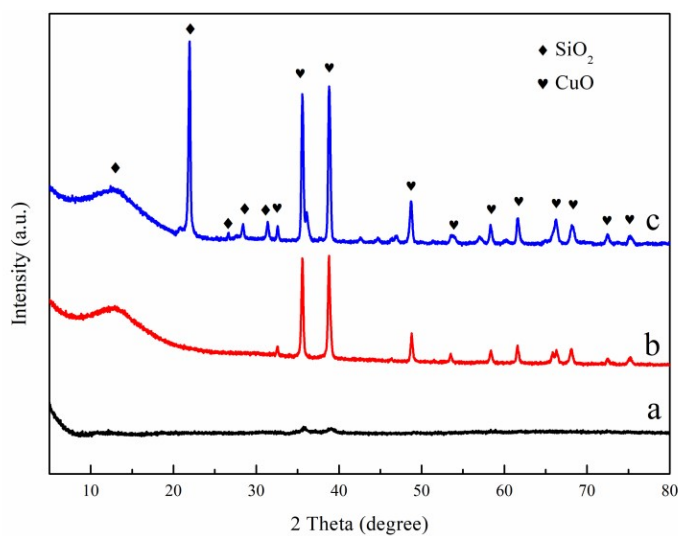

Fig. 1s XRD patterns of a: 30CuO/SiO<sub>2</sub>; b: 30CuO/SiO<sub>2</sub>-650; c: 30CuO/SiO<sub>2</sub>-850;

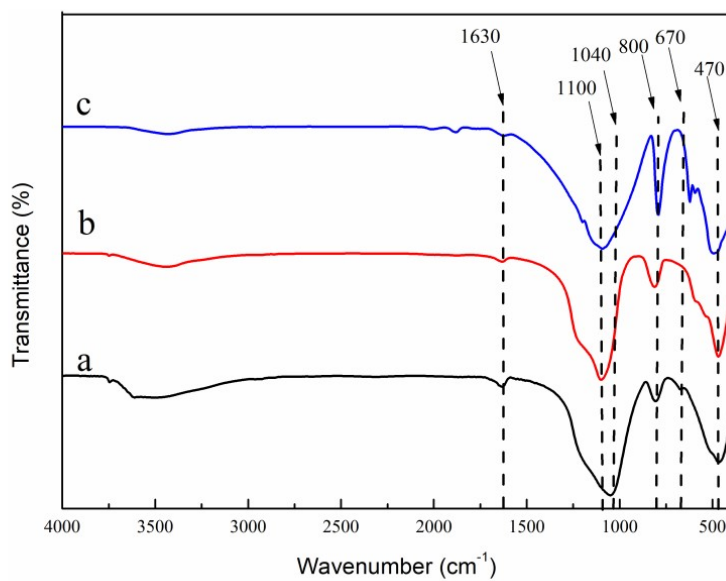

Fig. 2s FT-IR results a: 30CuO/SiO<sub>2</sub>; b: 30CuO/SiO<sub>2</sub>-650; c: 30CuO/SiO<sub>2</sub>-850;

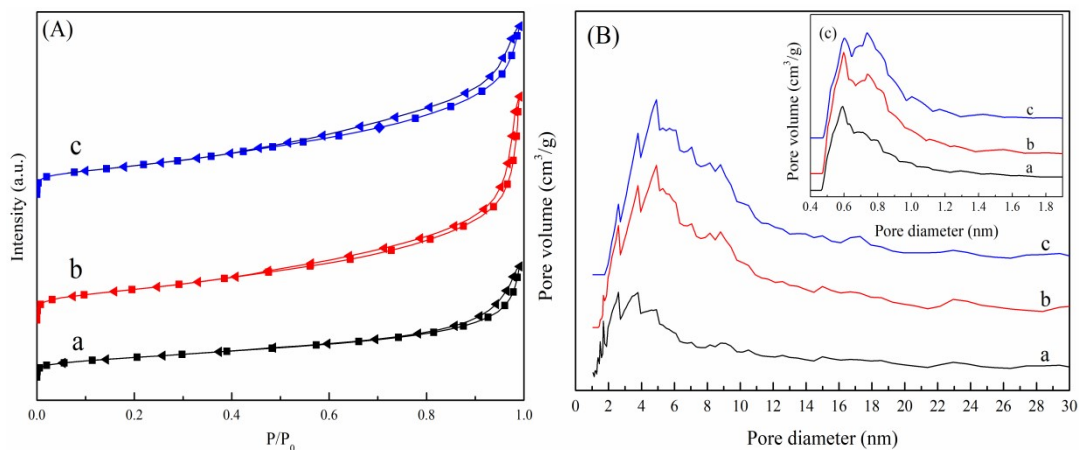

Fig. 3s N<sub>2</sub> adsorption-desorption results (A) adsorption isotherm curves (B) mesopore size distribution curves (C) micropore size distribution curves a: 20CuO/SiO<sub>2</sub>; b: 30CuO/SiO<sub>2</sub>; c: 40CuO/SiO<sub>2</sub>.

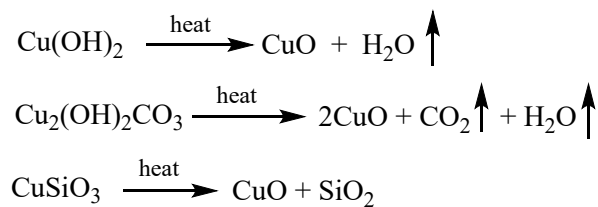

Fig. 4s The thermal decomposition equation of 30CuO/SiO<sub>2</sub> precursor

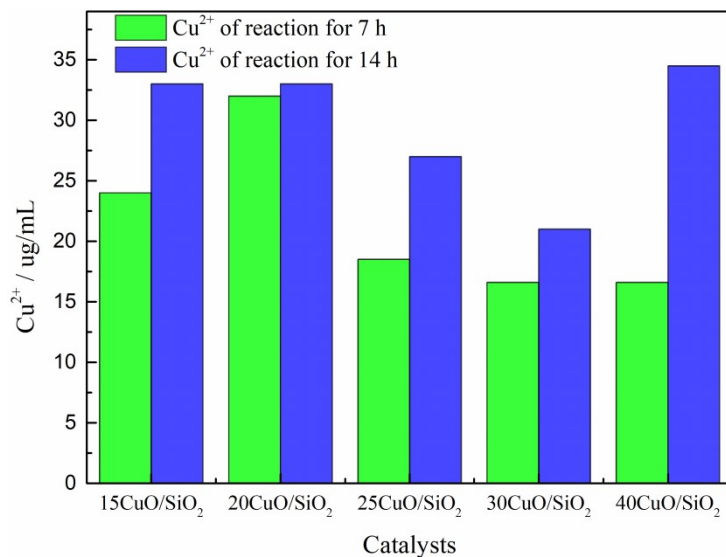

Fig. 5s Cu<sup>2+</sup> loss of xCuO/SiO<sub>2</sub> in ethynylation reaction of formaldehyde

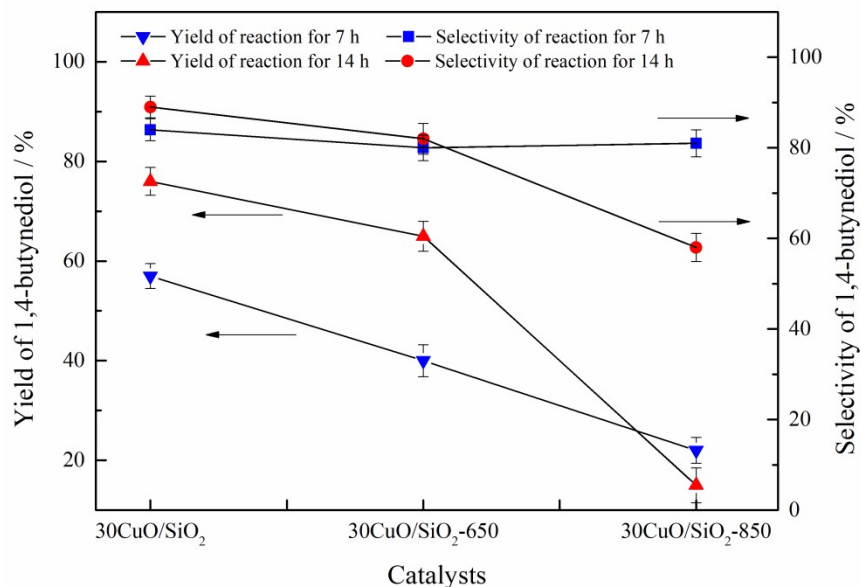

Fig. 6s The performances of 30CuO/SiO<sub>2</sub> in ethynylation reaction of formaldehyde

Table 1s The exact amount of catalysts preparation procedure and Cu weight

| Catalysts             | Cu(NO <sub>3</sub> ) <sub>2</sub> ·3H <sub>2</sub> O (g) | H <sub>2</sub> O (mL) | TEOS (mL) | EtOH (mL) | Cu wt % In theory | Cu wt %* |
|-----------------------|----------------------------------------------------------|-----------------------|-----------|-----------|-------------------|----------|
| 15Cu/SiO <sub>2</sub> | 3.398                                                    | 141                   | 18.10     | 20        | 15.00%            | 12.08%   |
| 20Cu/SiO <sub>2</sub> | 4.530                                                    | 188                   | 16.80     | 20        | 20.00%            | 17.79%   |
| 25Cu/SiO <sub>2</sub> | 5.663                                                    | 234                   | 15.10     | 20        | 25.00%            | 22.21%   |
| 30Cu/SiO <sub>2</sub> | 6.795                                                    | 281                   | 14.00     | 20        | 30.00%            | 27.32%   |
| 40Cu/SiO <sub>2</sub> | 9.060                                                    | 375                   | 11.20     | 20        | 40.00%            | 38.08%   |

\*Cu weight content (Cu w t %) in catalysts obtained from atomic absorption spectroscopy.

Table 2s Textural properties of catalysts

| Catalyst               | A <sub>BET</sub> (m <sup>2</sup> ·g <sup>-1</sup> ) | D <sub>micropore</sub> (nm) | D <sub>mesopore</sub> (nm) | V <sub>total</sub> (cm <sup>3</sup> ·g <sup>-1</sup> ) |
|------------------------|-----------------------------------------------------|-----------------------------|----------------------------|--------------------------------------------------------|
| 20CuO/SiO <sub>2</sub> | 320.02                                              | 0.593                       | 3.54                       | 0.75                                                   |
| 30CuO/SiO <sub>2</sub> | 498.57                                              | 0.598                       | 4.90                       | 1.51                                                   |
| 40CuO/SiO <sub>2</sub> | 479.31                                              | 0.737                       | 4.90                       | 1.14                                                   |
